# Supplementary material for: Mechanisms of bismuth-activated near-infrared photoluminescence – a first-principles study on the MXCl3series
Source: Royal Society of Chemistry journal article supplement (doi:10.1039/d1cp01632f), 2021-01-01
Supplement: d1cp01632f1.pdf [file d1cp01632f1.pdf]

## Supplemental Information of Mechanisms of bismuth-activated near-infrared photoluminescence - a first-principles study on the $MXCl_3$ series

Qiaoling Chen,<sup>1,2,3</sup> Weiguo Jing,<sup>1,2,3</sup> Yau-Yuen Yeung,<sup>4</sup> Min Yin,<sup>5,\*</sup> and Chang-Kui Duan<sup>1,2,3,†</sup>

<sup>1</sup>Hefei National Laboratory for Physical Sciences at the Microscale and School of Physical Sciences, University of Science and Technology of China, Hefei 230026, China

<sup>2</sup>CAS Key Laboratory of Microscale Magnetic Resonance, University of Science and Technology of China, Hefei 230026, China

<sup>3</sup>Synergetic Innovation Center of Quantum Information and Quantum Physics, University of Science and Technology of China, Hefei 230026, China

<sup>4</sup>Department of Science and Environmental Studies, The Education University of Hong Kong, 10 Lo Ping Road, Tai Po, NT, Hong Kong, China

<sup>5</sup>CAS Key Laboratory of Strongly-Coupled Quantum Matter Physics, University of Science and Technology of China, Hefei 230026, China

### NOTE 1 CHARGE CORRECTIONS

Defect calculations are often performed by periodic boundary conditions within density-functional theory (DFT) and the periodic translations introduce the electrostatic interaction of the defect and its images when the defects has net charge. For computational costs, *post hoc* corrections to final energy is employed and several approaches have been proposed to overcome this problem, such as Makov and Payne (MP), Freysoldt, Neugebauer, and Van de Walle (FNV), and Lany and Zunger (LZ). Besides, the use of periodic boundary conditions also creates an additional problem that the bulk electrostatic potential is not properly recovered far from the defect. Recently, Durrant *et al.* proposed that the combination of the Lany-Zunger correction for the charged defects due to image charge and the potential alignment between neutral systems (the original host supercell and the unrelaxed supercell containing the defect) can yield accurate corrections for cubic supercells [1]. Hence, this approach is adopted here for Bi:MXCl<sub>3</sub> systems.

For the image charge correction, the Lany-Zunger (LZ) correction is given by

$$E_{\text{corr}}^{\text{LZ}} = (1 + f) \frac{q^2 \alpha_M}{2\epsilon L} \quad (1)$$

where  $1 + f \approx 2/3$ , Madelung-like constant  $\alpha_M = 2.837$  for a cubic supercell,  $\epsilon$  is the dielectric constant and  $L = \Omega^{1/3}$  is the linear supercell dimension ( $\Omega$  is the volume of supercell). Since the ionic relaxation provides additional dielectric screening of the interactions between the replicas, the static dielectric constant  $\epsilon_0$  is applied.

For the potential alignment, Durrant *et al.* [1] proposed that the potential shift caused by change in atomic composition is the dominant remaining finite-size error once the image charge interaction correction has been applied. The potential difference between the neutral supercell

containing the defects (unrelaxed) and the perfect supercell are calculated. Fig. S1 shows the potential difference of defects in KMgCl<sub>3</sub> crystal and take defect of Bi<sub>K</sub> for example, the correction for an electron is  $q\Delta V = -0.04$  eV, i.e.,  $\Delta V = 0.04$  V. The detailed correction to total energies are listed in Table S1.

### NOTE 2 DEFECT FORMATION ENERGY

The formation energy of a defect in charge state  $q$  is defined as [2]

$$E^f[X^q] = E_{\text{tot}}[X^q] - E_{\text{tot}}[\text{bulk}] - \sum_i n_i \mu_i + qE_F \quad (2)$$

Here, we take the KMgCl<sub>3</sub> crystal in the condition of Fig. 1 as an example to discuss the computational details. First, the geometric relaxation is applied for KMgCl<sub>3</sub> primitive cell. A supercell is constructed based on the relaxed primitive cell, where new-base vectors are [2a, 2b, 2c] for KMgCl<sub>3</sub>.  $E_{\text{tot}}[\text{bulk}]$  is the total energy of the perfect supercell. Bi<sub>K</sub>, Bi<sub>Mg</sub>, V<sub>K</sub>, V<sub>Mg</sub>, V<sub>Cl</sub> defects are considered and Tabel S5 lists the differences in the number of atom species  $n_i$  between the supercell containing the defect and perfect supercell. The geometric relaxation with fixing supercell volume is applied to the supercell containing a defect in charge state  $q$  and the total energy is obtained as  $E_{\text{tot}}[X^q]$ , where the charge corrections should be included. The chemical potentials can be expressed by  $\mu_i = \mu_i^0 + \Delta\mu_i$  and  $\Delta\mu_i$  is the excess chemical potential to their reference state and can be viewed as a tunable term to describe the experimental growth condition. The reference chemical potential  $\mu_{\text{Cl}}^0$  is obtained as -1.91 eV with GGA-PBEsol method. It is half of the energy of an isolated chlorine molecule, which is calculated by placing an chlorine molecule in a  $10 \times 10 \times 10 \text{ \AA}^3$  supercell. In the condition of Fig. 1, the chemical potential  $\mu_{\text{Cl}} = \mu_{\text{Cl}}^0 + \Delta\mu_{\text{Cl}}$  is -2.91 eV. Similarly, the reference chemical potentials  $\mu_{\text{KCl}}^0$  and  $\mu_{\text{MgCl}_2}^0$  are -7.03 eV and -11.35 eV from the total energy calculations for KCl and MgCl<sub>2</sub> crystals, respectively. Then the chemical potentials  $\mu_{\text{KCl}} = \mu_{\text{KCl}}^0 + \Delta\mu_{\text{KCl}}$  and

\* yinmin@ustc.edu.cn (M. Yin)

† ckduan@ustc.edu.cn (C.-K. Duan)

$\mu_{\text{MgCl}_2} = \mu_{\text{MgCl}_2}^0 + \Delta\mu_{\text{MgCl}_2}$  are -7.08 eV and -11.35 eV, when  $\Delta\mu_{\text{MgCl}_2} = 0$  and  $\Delta\mu_{\text{KCl}} = \Delta H_{\text{KMgCl}_3}$  correspondingly in the case of acidic chlorine  $\text{MgCl}_2$  being residue. Thus,  $\mu_{\text{K}}$  and  $\mu_{\text{Mg}}$  can be calculated by  $\mu_{\text{K}} = \mu_{\text{KCl}} - \mu_{\text{Cl}} = -4.17$  eV and  $\mu_{\text{Mg}} = \mu_{\text{MgCl}_2} - 2\mu_{\text{Cl}} = -5.53$  eV. The defect formation energy is obtained as a linear function of the Fermi energy ( $E_F$ ) that is referenced to the valence-band maximum (VBM), as shown in Fig. 1. The same procedures are conducted for the defects in other  $\text{MXCl}_3$  hosts. All data are available on request from the corresponding author.

### NOTE 3 THE LUMINESCENCE OF $\text{Bi}^{3+}$

Previous study has reported the luminescence properties of  $\text{Bi}^{3+}$  in  $\text{CsMgCl}_3$  and  $\text{CsCdBr}_3$  crystals in experiments to show violet to blue light [3]. As plotted in Fig.

S5, the unoccupied 6s character level and lowest 6p KS orbital character level are calculated with PBE0 method, which is obtained by removing a 6s electron in the equilibrium structure of  $\text{Bi}^{3+}$  ground state. The energy difference corresponds to the theoretical zero-phonon-line of the transitions, which is roughly the average of excitation and emission energies. These are consistent with experiments. Besides,  $\text{CsCdCl}_3:\text{Bi}^{3+}$  is applied to interpret the luminescence of  $\text{Bi}^{3+}$  in  $\text{CsCdBr}_3$  crystal because  $\text{Bi}^{3+}$  coordinated with similar Cd ligands. Since the valence band maximum is dominated by the halogen elements, Br has higher 3p than Cl with 2p orbital energy. And thus,  $\text{Bi}^{3+}$  in  $\text{CsCdBr}_3$  crystal shows more preferable of the charge transfer transition and  $\text{Bi}^{3+}$  in  $\text{CsMgCl}_3$  crystal has both the intra-ionic electron transitions and the charge transfer transition. While more detailed calculation is needed for clarify, we can nevertheless exclude that  $\text{Bi}^{3+}$  exhibits the NIR emission under red light excitation.

---

[1] T. R. Durrant, S. T. Murphy, M. B. Watkins, and A. L. Shluger. Relation between image charge and potential alignment corrections for charged defects in periodic boundary conditions. *The Journal of chemical physics*, 149(2):024103, 2018.

[2] Christoph Freysoldt, Blazej Grabowski, Tilmann Hickel, Jörg Neugebauer, Georg Kresse, Anderson Janotti, and Chris G. Van de Walle. First-principles calculations for point defects in solids. *Reviews of modern physics*, 86(1):253, 2014.

[3] A. Wolfert and G. Blasse. Luminescence of  $s^2$  ions in  $\text{CsCdBr}_3$  and  $\text{CsMgCl}_3$ . *Journal of Solid State Chemistry*, 55(3):344–352, 1984.



TABLE S5. The differences in the number of atom species  $n_i$  of different defects in  $MXCl_3$  ( $M = K, Rb, Cd$ ;  $X = Mg, Cd$ ) hosts

|          | $Bi_M$ | $Bi_X$ | $V_M$ | $V_X$ | $V_{Cl}$ |
|----------|--------|--------|-------|-------|----------|
| $n_M$    | -1     | 0      | -1    | 0     | 0        |
| $n_X$    | 0      | -1     | 0     | -1    | 0        |
| $n_{Cl}$ | 0      | 0      | 0     | 0     | -1       |
| $n_{Bi}$ | 1      | 1      | 0     | 0     | 0        |

TABLE S6. Excitation and emission energies obtained by different calculation methods and experiments (units: eV)

|                          | Exc.-Expt. | Exc.-CDFT | Exc.-AIMP | Emi.-Expt. | Emi.-CDFT | Emi.-AIMP <sup>a</sup> |
|--------------------------|------------|-----------|-----------|------------|-----------|------------------------|
| KMgCl <sub>3</sub>       | 2.05/1.95  | 1.87/1.56 | 2.18/2.33 | 1.30       | 1.54      | 1.51                   |
| RbMgCl <sub>3</sub> -Rb1 | 2.03/1.92  | 1.80/1.69 | 2.26/2.28 | 1.37       | 1.63      | 1.57                   |
| RbMgCl <sub>3</sub> -Rb2 | 2.03/1.92  | 1.80/1.69 | 2.23/2.27 | 1.37       | 1.62      | 1.59                   |
| CsMgCl <sub>3</sub>      | 2.05/1.90  | 1.91/1.63 | 2.24/2.31 | 1.35       | 1.48      | 1.40                   |
| KCdCl <sub>3</sub>       | 2.02/1.81  | 1.69/1.46 | 2.15/2.29 | 1.31       | 1.25      | 1.34                   |
| RbCdCl <sub>3</sub>      | 2.05/1.85  | 1.90/1.56 | 2.12/2.34 | 1.22       | 1.25      | 1.20                   |
| CsCdCl <sub>3</sub> -Cs1 | 2.02/1.90  | 1.83/1.68 | 2.22/2.29 | 1.27       | 1.41      | 1.32                   |
| CsCdCl <sub>3</sub> -Cs2 | 2.02/1.90  | 2.30/1.67 | 2.15/2.63 | 1.27       | 1.40      | 1.11                   |

<sup>a</sup> Calculated by the first excited energy in the ground state and then subtract the Stokes shift, which is roughly estimated by the results of CDFT method.

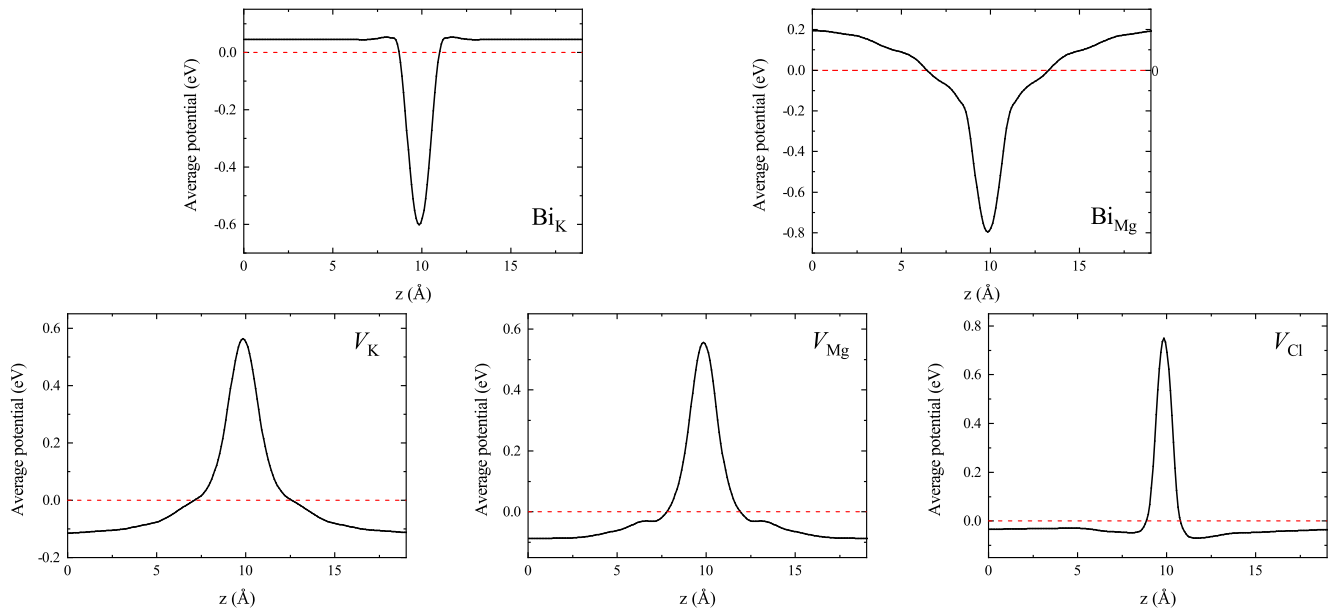

FIG. S1. The potential difference between the neutral supercell containing the defects of  $Bi_K$ ,  $Bi_{Mg}$ ,  $V_K$ ,  $V_{Mg}$ ,  $V_{Cl}$  (unrelaxed) and the perfect supercell in  $KMgCl_3$  crystal.

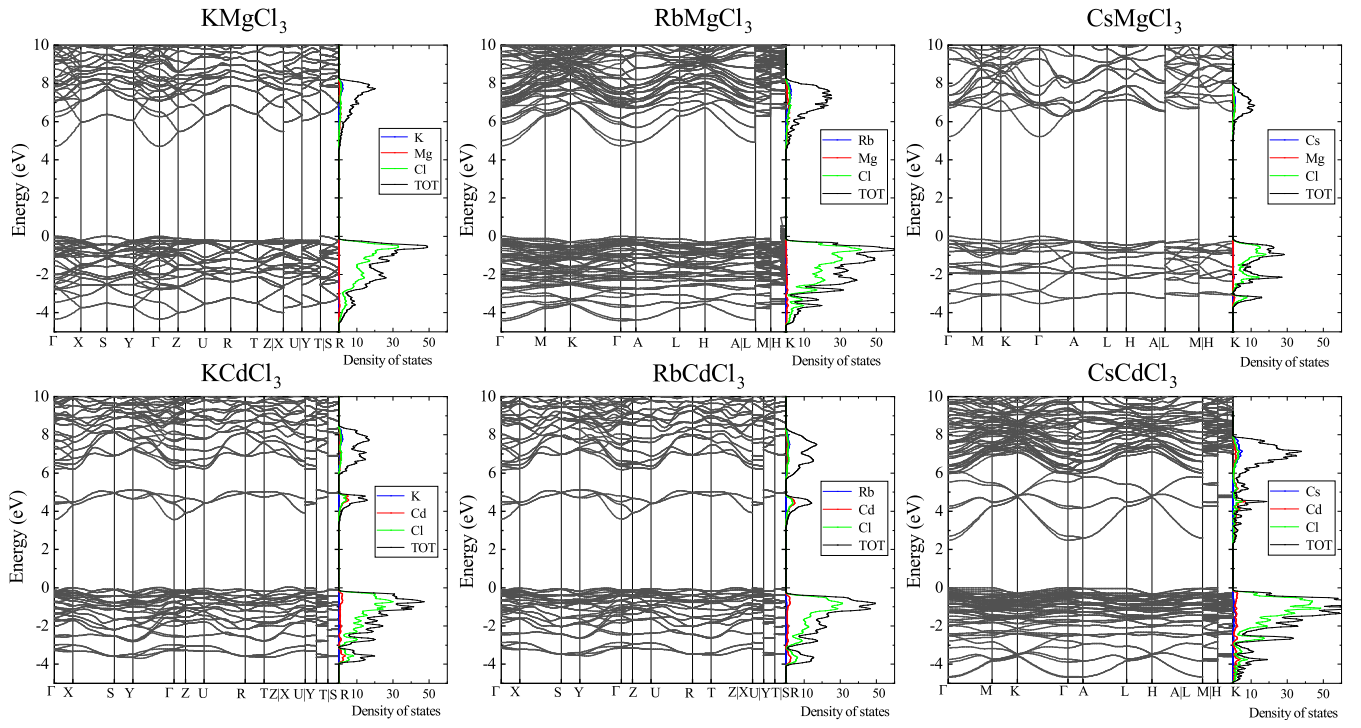

FIG. S2. Band structure and density of states of  $MXCl_3$  crystals

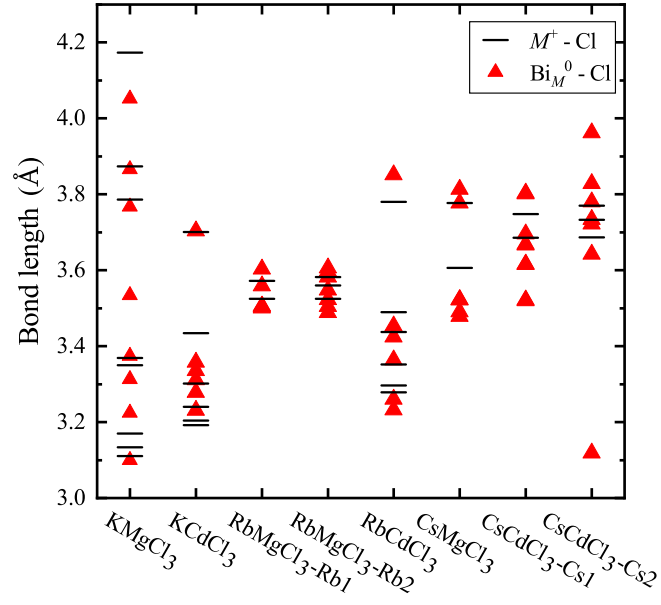

FIG. S3. The bond lengths of  $M^+ - Cl$  (black line) and  $Bi_M^0 - Cl$  (red triangle) in  $MXCl_3$  ( $M = K, Rb, Cs$ ;  $X = Mg, Cd$ ) crystals.

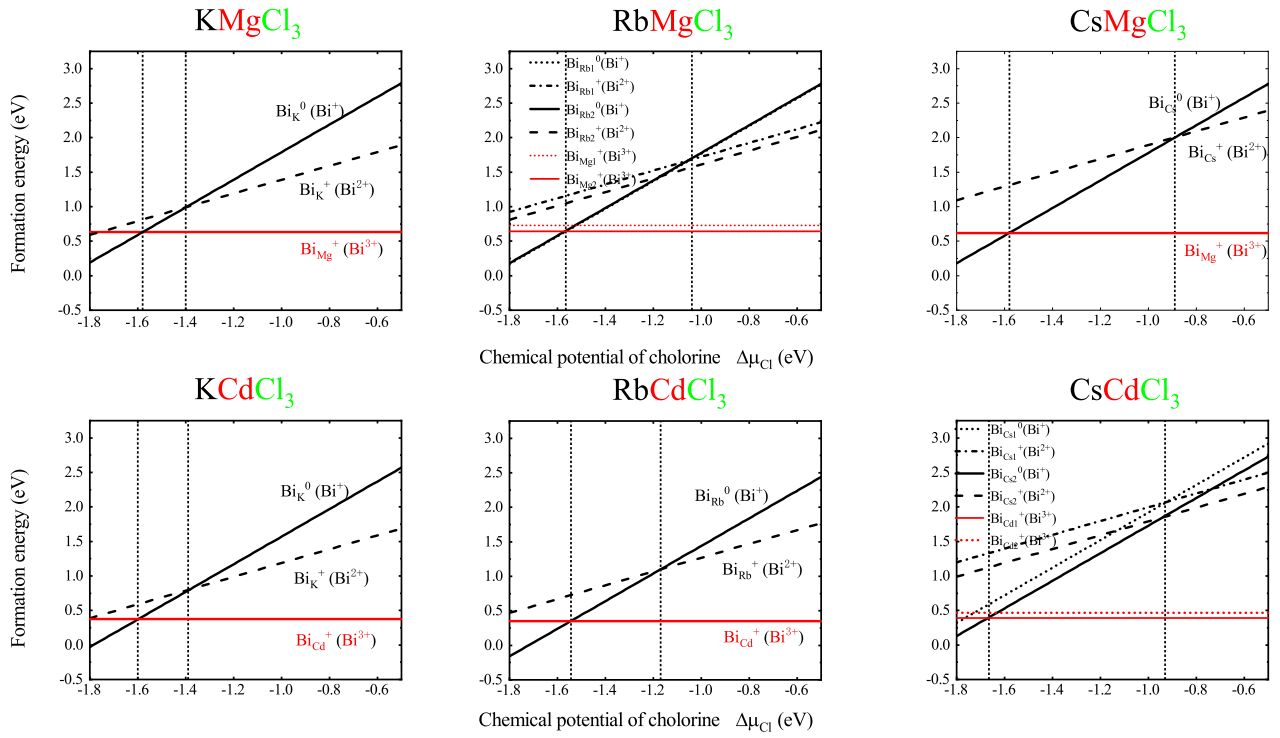

FIG. S4. Calculated formation energies of Bismuth defects as a function of chemical potential of chlorine  $\Delta\mu_{\text{Cl}}$  in  $\text{MXCl}_3$  ( $M = \text{K, Rb, Cs}$ ;  $X = \text{Mg, Cd}$ ) crystals.

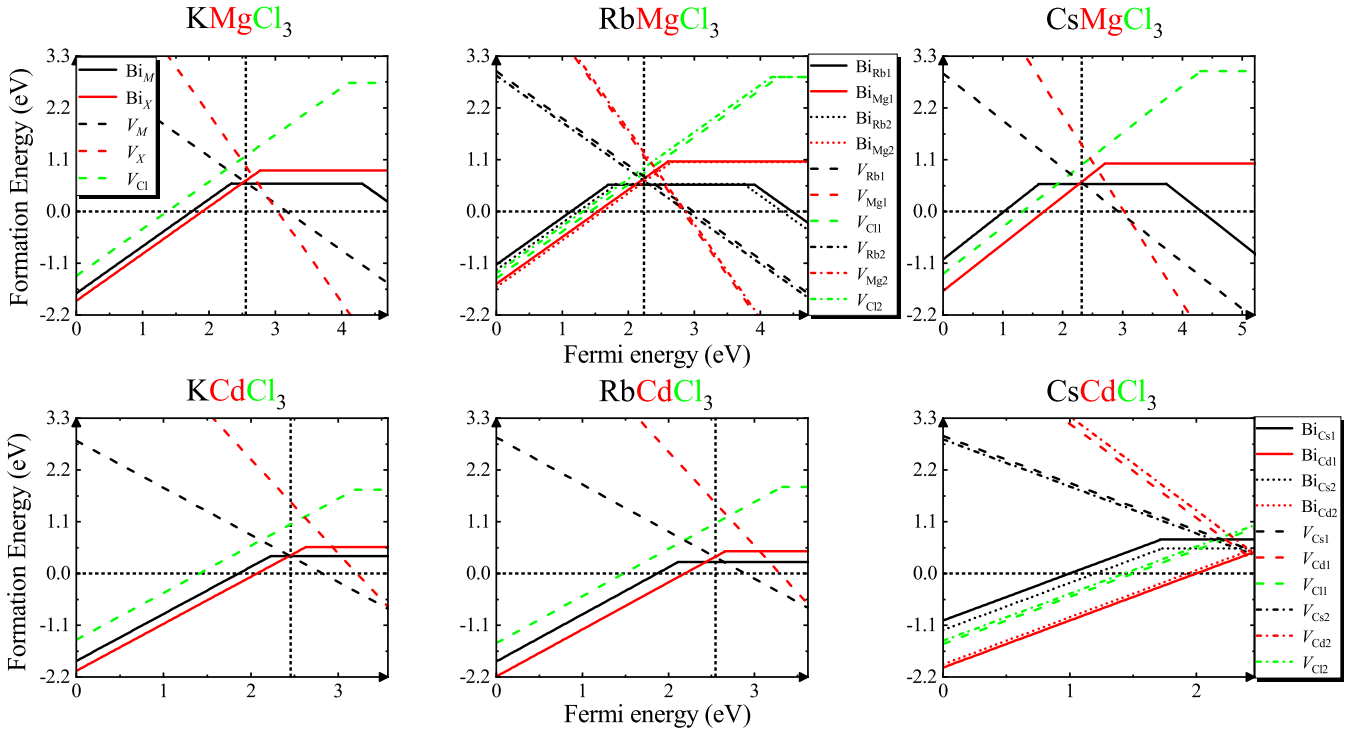

FIG. S5. Formation energies of bismuth substitutions  $\text{Bi}_M$ ,  $\text{Bi}_X$  and intrinsic defects  $V_M$ ,  $V_X$ ,  $V_{\text{Cl}}$  in  $\text{MXCl}_3$  ( $M = \text{K, Rb, Cs}$ ;  $X = \text{Mg, Cd}$ ) crystals as a function of Fermi level in the condition of  $\Delta\mu_{\text{Cl}} = -1.60$  eV.

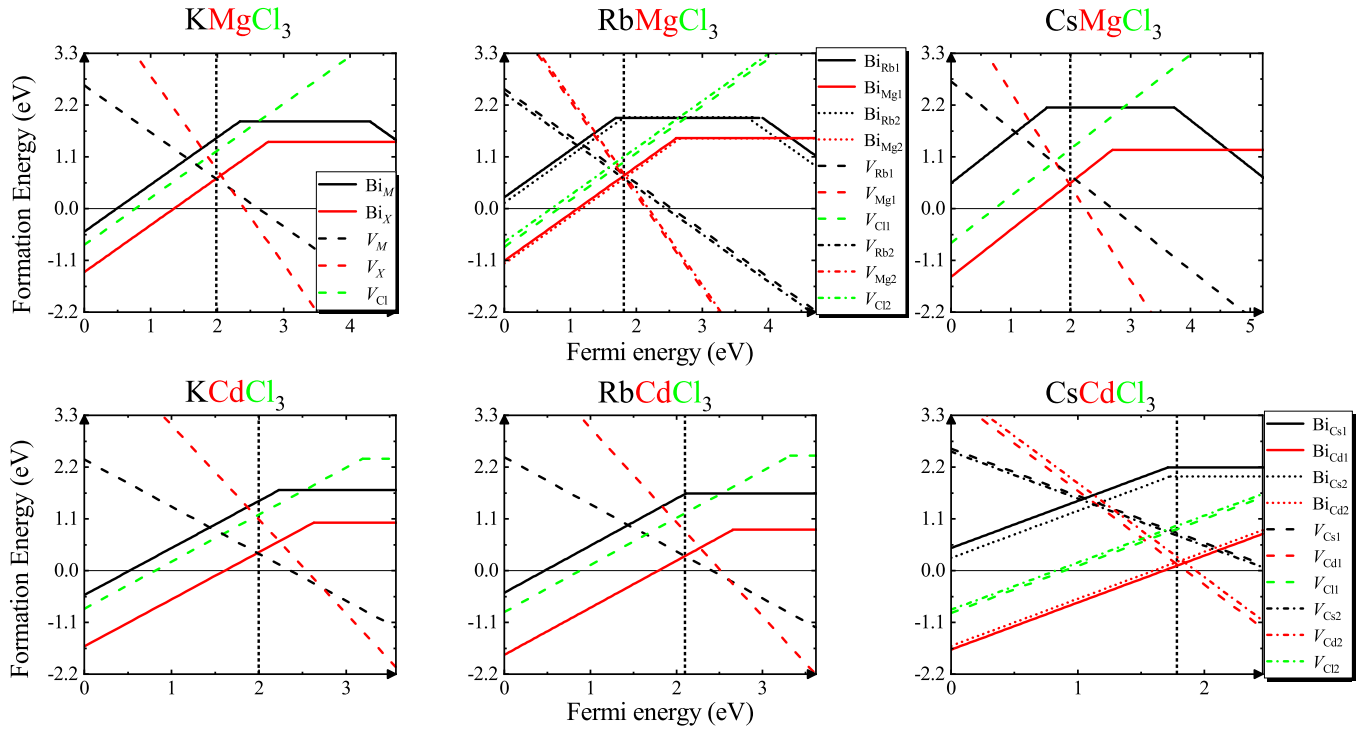

FIG. S6. Formation energies of bismuth substitutions  $\text{Bi}_M$ ,  $\text{Bi}_X$  and intrinsic defects  $V_M$ ,  $V_X$ ,  $V_{\text{Cl}}$  in  $\text{MXCl}_3$  ( $M = \text{K}, \text{Rb}, \text{Cs}$ ;  $X = \text{Mg}, \text{Cd}$ ) crystals as a function of Fermi level in the condition of  $\Delta\mu_{M\text{Cl}} = 0$  and  $\Delta\mu_{\text{Cl}} = -1.0$  eV.

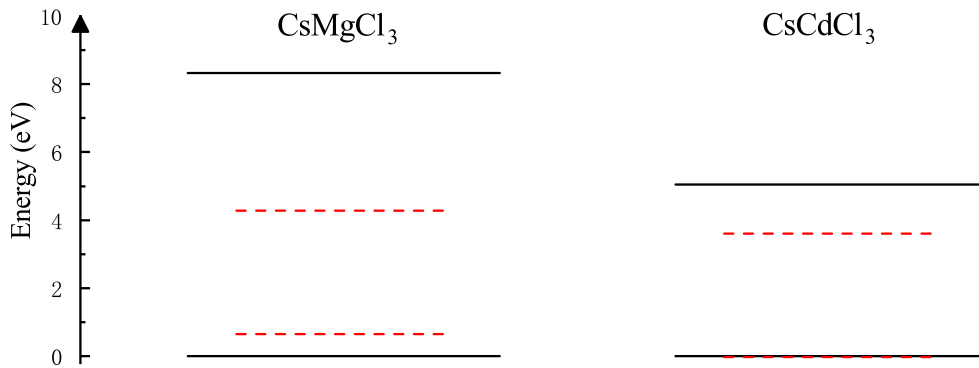

FIG. S7. The unoccupied  $6s$  and lowest  $6p$  KS orbital energy levels of  $\text{Bi}^{3+}$  in  $\text{CsMgCl}_3$  and  $\text{CsCdCl}_3$  crystals with PBE0 method.

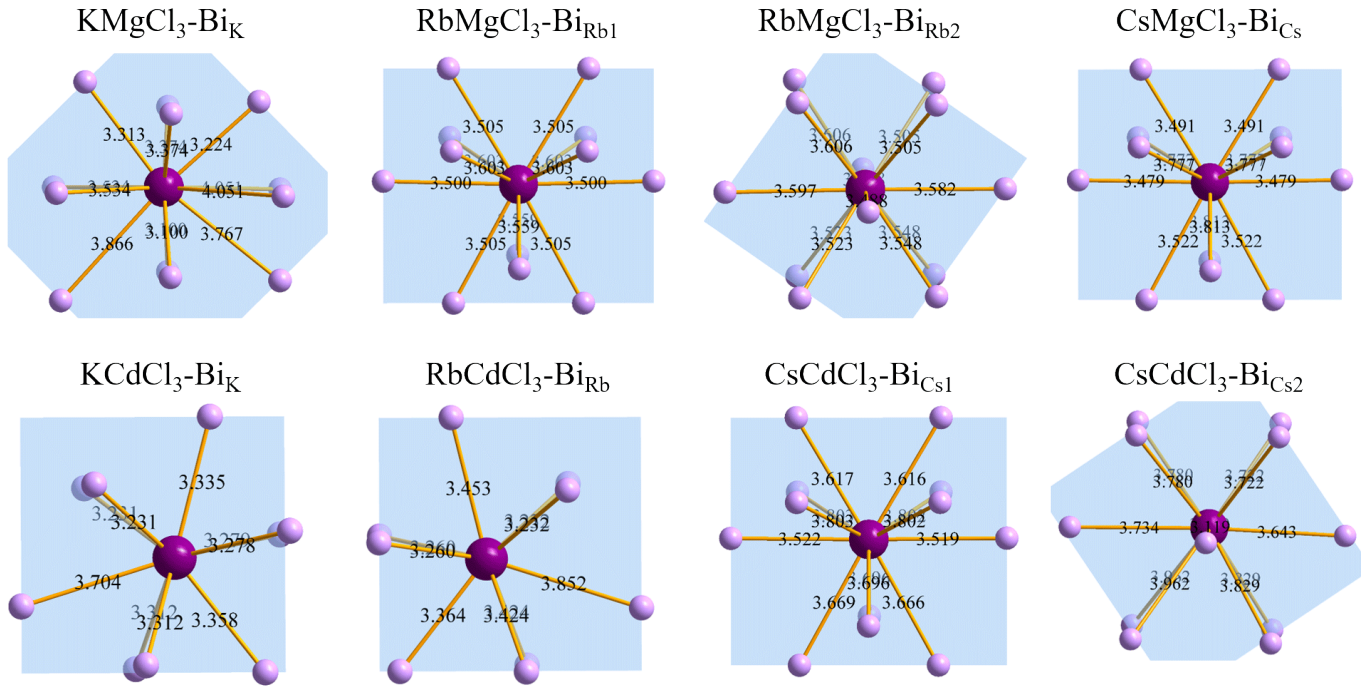

FIG. S8. Surrounding chlorine ions of bismuth substitutions  $\text{Bi}_M^0$  in different sites of a series of  $\text{MXCl}_3$  crystals (in units of  $\text{\AA}$ ).
